# Supplementary material
Source: Springer Nature journal article supplement (https://www.springermedizin.de/resource/supplementary/13005_2010_195_MOESM1_ESM.pdf/9626510)

**A**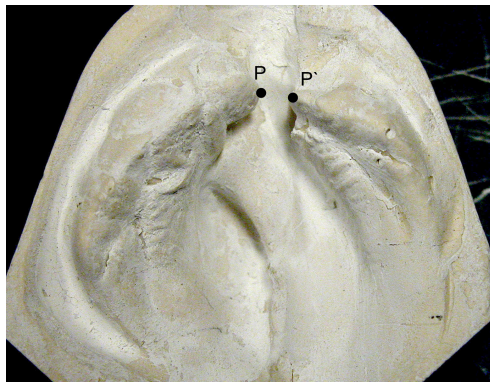**B**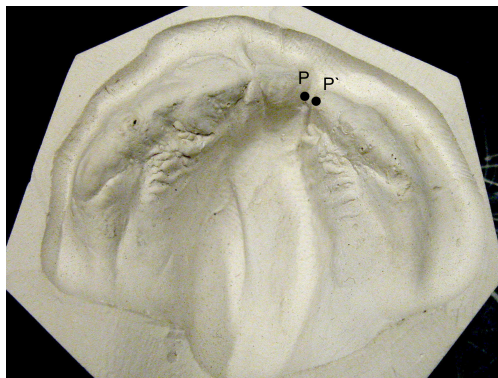**C**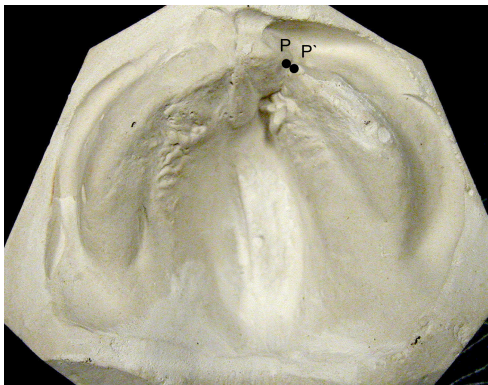**D**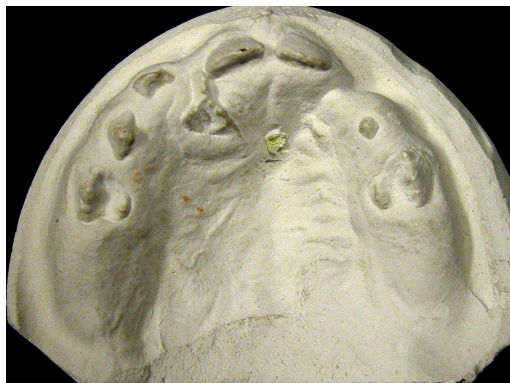

Supplement: MOESM1 [file 9626510]
